# Supplementary material
Source: PubMed Central journal article supplement (PMC4353058)
Supplement: jp508512s_si_001.pdf [file jp508512s_si_001.pdf]

## Supporting Information

### Absorption and Fluorescence Spectra of Poly-(p-phenylene vinylene) (PPV) oligomers: An Ab Initio Simulation

Thiago M. Cardozo,<sup>a,\*</sup> Adélia J. A. Aquino,<sup>b</sup> Mario Barbatti,<sup>c</sup> Itamar Borges, Jr.,<sup>d</sup> and Hans Lischka<sup>b,d\*</sup>

<sup>a</sup> Instituto de Química, Universidade Federal do Rio de Janeiro, Avenida Athos da Silveira Ramos, 149, 21941-909 - Cidade Universitária - Rio de Janeiro, RJ, Brazil.

<sup>b</sup> Dep. of Chemistry and Biochemistry, Texas Tech University, Lubbock, Texas 79409-1061, USA

<sup>c</sup> Max-Planck-Institut für Kohlenforschung, Kaiser-Wilhelm-Platz 1, D-45470 Mülheim an der Ruhr, Germany

<sup>d</sup> Departamento de Química, Instituto Militar de Engenharia, Praça General Tibúrcio, 80, 22290-270 Rio de Janeiro, Brazil

<sup>d</sup> Institute for Theoretical Chemistry, University of Vienna, 1090 Vienna, Austria

|                                               |    |
|-----------------------------------------------|----|
| Table S1– Stilbene geometry parameters        | S2 |
| Scheme S1 – Atom-labeling scheme for stilbene | S3 |

**Table S1**– Stilbene geometry parameters calculated at the RI-MP2/SV(P) level. Frozen core corresponds to calculations done with the first 14 orbitals frozen, and frozen (core+14), to the first 28 orbitals frozen. Atom labels are identified in Scheme S1.

|                           | <b>Frozen<br/>core</b> | <b>Frozen<br/>(core +14)</b> |
|---------------------------|------------------------|------------------------------|
| Bond distances (Å)        |                        |                              |
| C2-C3                     | 1.356                  | 1.358                        |
| C3-C4                     | 1.466                  | 1.482                        |
| C4-C5                     | 1.408                  | 1.409                        |
| C5-C6                     | 1.397                  | 1.400                        |
| C6-C7                     | 1.400                  | 1.402                        |
| C7-C8                     | 1.401                  | 1.403                        |
| C8-C9                     | 1.397                  | 1.399                        |
| C9-C4                     | 1.409                  | 1.411                        |
| C2-H1                     | 1.100                  | 1.079                        |
| C5-H3                     | 1.097                  | 1.071                        |
| Angles (degrees)          |                        |                              |
| H1-C2-C3                  | 118.72                 | 119.20                       |
| C2-C3-C4                  | 125.32                 | 124.45                       |
| C3-C4-C5                  | 119.39                 | 119.33                       |
| C4-C5-C6                  | 121.04                 | 120.64                       |
| Dihedral Angles (degrees) |                        |                              |
| C1-C2-C3-C4               | 180.62                 | 181.20                       |
| C2-C3-C4-C5               | 24.82                  | 24.29                        |
| H1-C2-C3-C4               | 3.40                   | 3.27                         |
| H2-C3-C4-C5               | 22.11                  | 22.24                        |

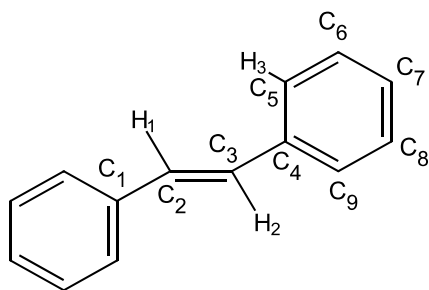

**Scheme S1** – Atom-labeling scheme for stilbene.
